# Supplementary material for: Identification of ILK as a new partner of the ADAM12 disintegrin and metalloprotease in cell adhesion and survival
Source: PubMed Central journal article supplement — Mol Biol Cell. 2012 Sep 1;23(17):3461–72. doi: 10.1091/mbc.E11-11-0918 (PMC3431925; doi:10.1091/mbc.e11-11-0918), 2012-09-01
Supplement: supp_E11-11-0918_CombinedSupMats.pdf [file supp_E11-11-0918_CombinedSupMats.pdf]

## Supplementary Data

### **Identification of ILK as a new partner of the ADAM12 disintegrin and metalloprotease in cell adhesion and survival**

Anthony Leyme,<sup>\*</sup> Katia Bourd-Boittin,<sup>\*</sup> Dominique Bonnier,<sup>\*</sup> Anaïs Falconer,<sup>†</sup> Yannick Arlot-Bonnemains,<sup>†</sup> and Nathalie Théret<sup>\*</sup>

<sup>\*</sup>INSERM U1085-IRSET, Université de Rennes 1, SFR Biosit, Rennes, France; <sup>†</sup>CNRS UMR 6290 IGDR, Université de Rennes 1, Rennes, France.

Address correspondence to: Dr Nathalie Théret INSERM U1085-IRSET, 2 Av Pr. L. Bernard, 35043 Rennes. France. Phone: 33(2)2 323 4811. E-mail: nathalie.theret@univ-rennes1.fr

This section contains Supplementary Figure S1, Figure S2, Figure S3 and Figure S4.

## Cos cells

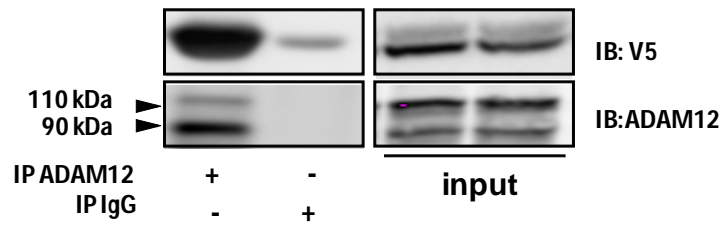

## LX2

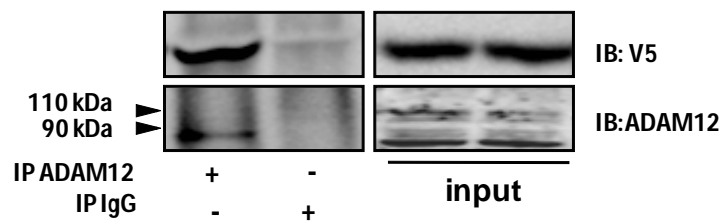

**Supplementary Figure S1. ADAM12L interactions with ILK in Cos7 and LX2 cells.** Cell extracts were prepared from Cos7 cells co-transfected with the long form of ADAM12, ADAM12L and V5-tagged ILK, or from hepatic stellate LX2 cells transfected with V5-tagged ILK. Extracts were immunoprecipitated (IP) with anti-ADAM12 and immunoblotted (IB) with anti-V5. The precursor and processed (active) forms of ADAM12 correspond to the 110 and 90-kDa species, respectively, detected by the antibody used.

A

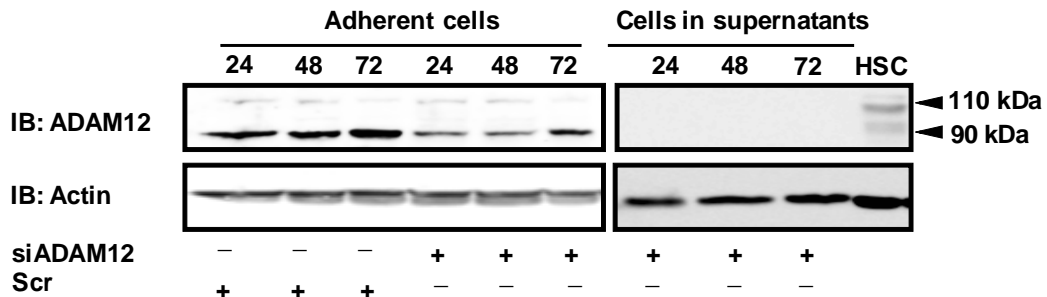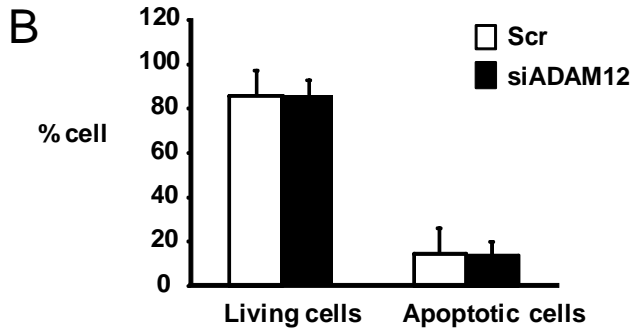

**Supplementary Figure S2: ADAM12 silencing in HSCs is associated with loss of cell adhesion without induction of cell death.** HSCs were transfected with 2 nM non-targeted siRNA (Scr) or ADAM12L siRNA (siADAM12) for the indicated times. A) Protein extracts from cells collected in culture supernatants and from adherent cells were immunoblotted with anti-ADAM12 antibodies (IB). Immunoblots for actin are shown as controls. Cell extracts from non-transfected HSCs were used as control (HSC). B) Apoptosis was measured after 48 hrs of transfection by microscopic detection using Hoechst 33342 labeling (0.5  $\mu$ g/ml). Cells with apoptotic nuclei were counted relative to the total population (n = 200).

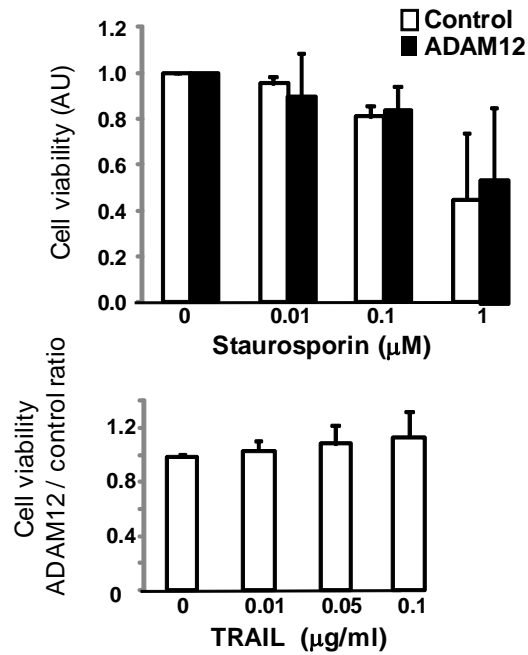

**Supplementary Figure S3: Overexpression of ADAM12 does not protect cells from Staurosporine- and TRAIL-induced cell death.** Chinese hamster ovary (CHO) cells were transfected with ADAM12L or an empty vector (control). At 48 hours post transfection, cells are further treated for 24 hours with A) Staurosporine (0-1 μM) and B) Flag-tagged TRAIL (0-0.1 μg/ml) from Alexis Biochemicals. A total of 2 μg/mL anti-Flag M2 (Sigma-Aldrich, Saint-Quentin Fallavier, France) was added to induce TRAIL oligomerization. Cell viability was assessed by methylene blue staining. Data represent the mean ± SD from three independent experiments performed in sextuplet.

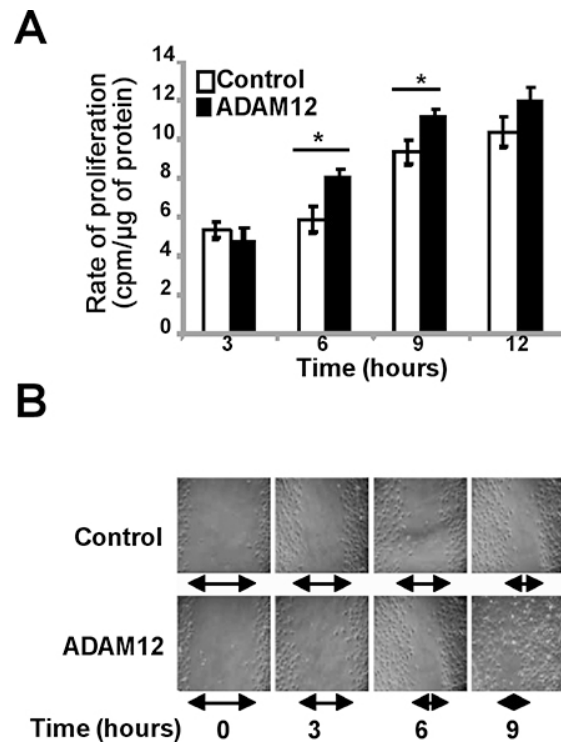

**Supplementary Figure S4. Expression of ADAM12 favors cell proliferation and migration.** Cos7 cells were transfected with empty vector (control) or ADAM12 constructs and cultured for 48 hrs. The cells were then plated on dishes coated with type I collagen for the indicated times. (A) Cell proliferation was evaluated by  $^3\text{H}$ -thymidine incorporation. Results are expressed as the mean  $\pm$  s.d. of three independent experiments (\*,  $p < 0.05$ ). (B) Cell migration was evaluated by the scratch wound-healing assay, in which a confluent cell monolayer is scratched with a pipette tip and the bare area is subsequently assessed for relocation of cells. Representative data from three independent experiments are shown and arrows indicate the width of the wound.
